# Supplementary material
Source: PubMed Central journal article supplement (PMC3092802)

**Supplementary Materials:**

**Crystal structure of native *Anopheles gambiae* Serpin-2, a negative regulator of melanization in mosquitoes**

**An et al.**

Supplementary figure legends

Table S1: Structural comparison of *An. gambiae* SRPN2 with other serpins

Figure S1: 2Fo-Fc electron density map of loop insertion in the  $P6_3$  crystal form.

Figure S2: 2Fo-Fc electron density map of loop insertion in the  $I4_132$  crystal form.

Figure S3. The heparin binding site of ATIII is not conserved in SRPN2.

## SUPPLEMENTARY FIGURE LEGENDS

**Figure S1.** 2Fo-Fc electron density map contoured at  $1\sigma$  for the  $P6_3$  crystal form of the RCL residues (green) that are inserted between the two  $\beta$ -strands (magenta).

**Figure S2.** 2Fo-Fc electron density map contoured at  $1\sigma$  for the  $I4_132$  crystal form of SRPN2 showing the backbone trace of the loop insertion.

**Figure S3. The heparin binding site of ATIII is not conserved in SRPN2.** (A) Surface electrostatic potential representation of heparin bound ATIII (PDB: 2GD4). View is perpendicular to the heparin binding site of antithrombin III and the heparin is shown in green as a reference. (B) Surface electrostatic potential representation of Spn48 (PDB:3OZQ), view perpendicular to putative heparin-binding site, which is indicated by yellow arrowheads. Neither binding site is conserved in SRPN2 (C, D). Positive and negative charges are colored blue and red, respectively.

## SUPPLEMENTARY TABLE

**Table S1. Secondary structure comparison of *An. gambiae* SRPN2 with other serpins.**

| <b>Protein</b>      | <b>Organism</b>         | <b>PDB ID</b> | <b>Hinge insertion</b> | <b>RMSD (Å)</b> |
|---------------------|-------------------------|---------------|------------------------|-----------------|
| Serpin 1K           | <i>Manduca sexta</i>    | 1K9O          | no                     | 1.72            |
| Serpin 1B A353K     | <i>Manduca sexta</i>    | 1SEK          | no                     | 1.65            |
| Antithrombin III    | <i>Homo sapiens</i>     | 1T1F          | yes                    | 1.71            |
| Antithrombin-S195A  | <i>Homo sapiens</i>     | 2GD4          | no                     | 1.66            |
| Spn48               | <i>Tenebrio molitor</i> | 3OZQ          | yes                    | 1.56            |
| Murine chymotrypsin | <i>Mus musculus</i>     | 1YXA          | yes                    | 1.62            |
| heparin cofactor II | <i>Homo sapiens</i>     | 1JMJ          | yes                    | 1.82            |

Figure S1

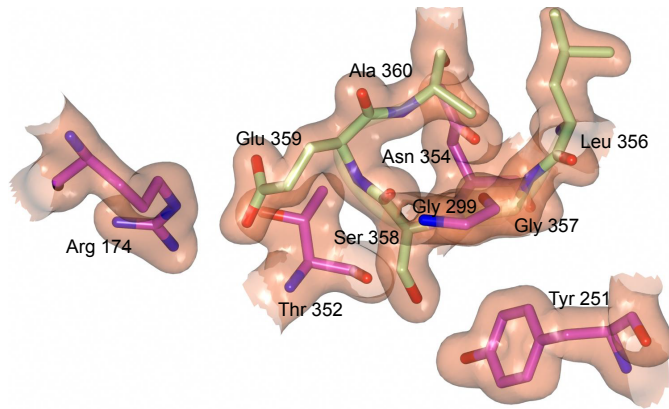

Figure S2

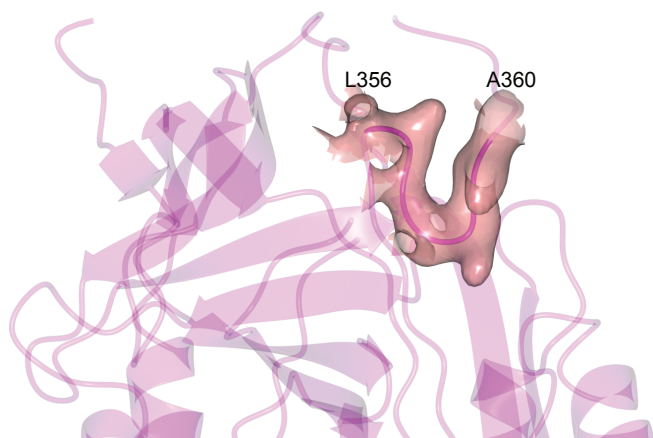

Figure S3

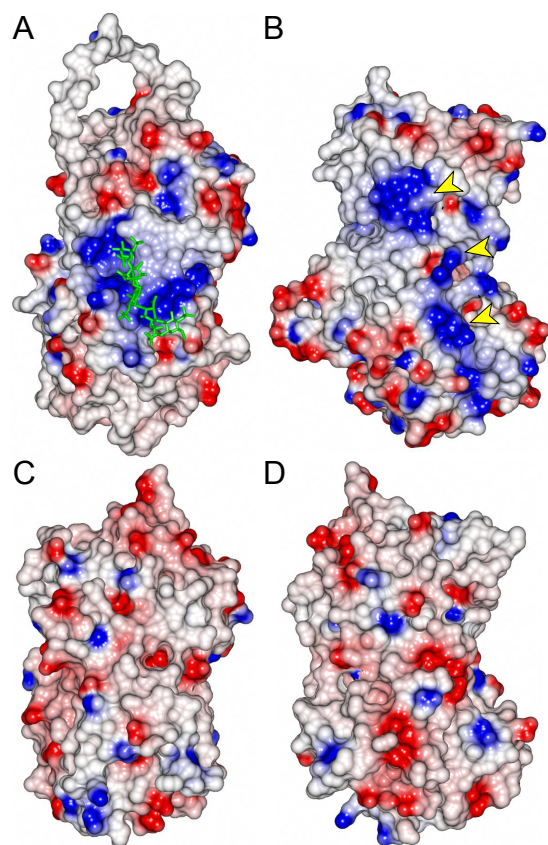

Supplement: NIHMS268987-supplement-Supp_Figure_S1-S3___Table_S1.pdf [file NIHMS268987-supplement-Supp_Figure_S1-S3___Table_S1.pdf]
